# Supplementary material
Source: PubMed Central journal article supplement (PMC2880190)
Supplement: NIHMS60298-supplement-SI1.pdf [file NIHMS60298-supplement-SI1.pdf]

## Supplementary information for manuscript titled

Sulfur K-edge XAS and DFT Calculations on P450 Model Complexes: Effects of Hydrogen Bonding on Electronic Structure and Redox Potentials .

**Fig. S1 XAS absorption and 2<sup>nd</sup> derivatives for SPh,L1,L2 complexes**

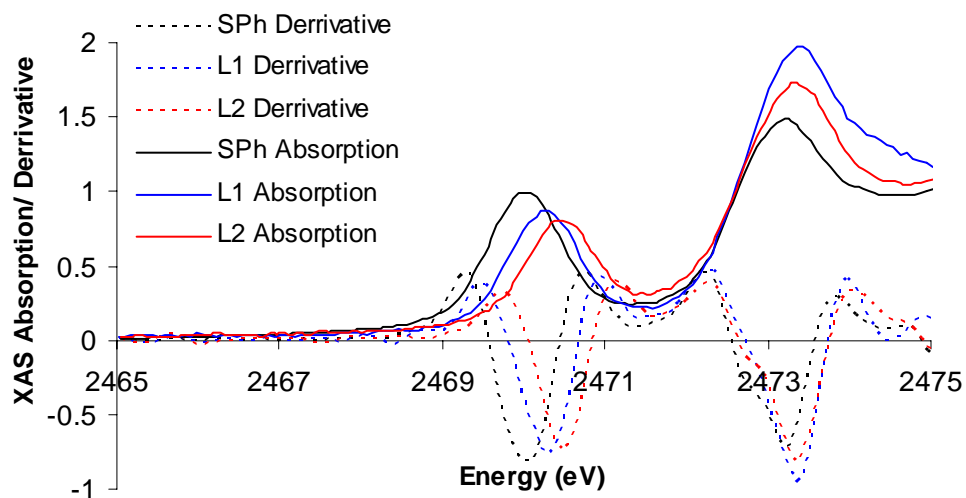

Table S1: The estimated  $-I$  effect of the substituent ligands from charges on  $\alpha$  and  $\beta$  carbon of a substituted ethylene.

| R                     | q ( $\beta$ -carbon) | q ( $\alpha$ -carbon) |
|-----------------------|----------------------|-----------------------|
| CF <sub>3</sub> CONH- | -0.1089              | 0.0130                |
| CH <sub>3</sub> CONH- | -0.1306              | 0.0054                |
| CF <sub>3</sub> COO   | -0.0946              | 0.0335                |
| HCOO-                 | -0.1078              | 0.02                  |

| Table S2: 1s orbital energy shifts calculated from DFT calculations on the free ligands |         |                      |
|-----------------------------------------------------------------------------------------|---------|----------------------|
|                                                                                         | charge  | $\Delta E_{1s}$ (eV) |
| SPh                                                                                     | -0.55   | 0.00                 |
| L2                                                                                      | -0.333  | -1.22                |
| L2-ester                                                                                | -0.4926 | -0.52                |
| SPh-H2O                                                                                 | -0.2704 | -0.72                |

| Table S3: DFT calculated H-bonding energies for oxidized and reduced heme-thiolate systems and shifts in redox potentials using different functional and solvation models. |                                                |                                               |                                                 |                                                  |
|----------------------------------------------------------------------------------------------------------------------------------------------------------------------------|------------------------------------------------|-----------------------------------------------|-------------------------------------------------|--------------------------------------------------|
|                                                                                                                                                                            | BP86/PCM<br>(CH <sub>2</sub> Cl <sub>2</sub> ) | PBE/PCM<br>(CH <sub>2</sub> Cl <sub>2</sub> ) | B3LYP/PCM<br>(CH <sub>2</sub> Cl <sub>2</sub> ) | BP86/COSMO<br>(CH <sub>2</sub> Cl <sub>2</sub> ) |
| H-bonding energy<br>(oxidized)                                                                                                                                             | -1 kcal/mole                                   | -5 kcal/mole                                  | -10 kcal/mole                                   | -1 kcal/mole                                     |
| H-bonding energy<br>(reduced)                                                                                                                                              | -7 kcal/mole                                   | -11 kcal/mole                                 | -15 kcal/mole                                   | -6 kcal/mole                                     |
| Shift in redox<br>Potential                                                                                                                                                | +260 mV                                        | +260 mV                                       | +210 mV                                         | +220 mV                                          |

**Scheme S1: VBCI modeling of M-L bonding interaction.**

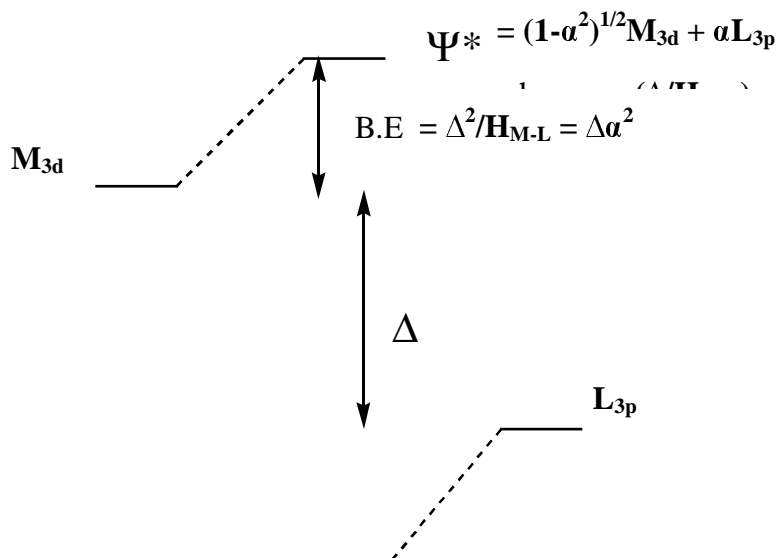

Scheme S1 represents VBCI modeling of the metal-ligand interaction in a system. The VBCI parameters  $\Delta$  and  $H_{M-L}$  represents the energy separation between the metal 3d and the ligand 3p orbitals when there is no interaction between them and the interaction matrix element, respectively. Bond energy (B.E) can be expressed as  $B.E = (\Delta)\alpha^2$ .

Now according to Scheme 1a and 1b, the difference in redox potential between the H-Bonding and the non H-bonding complexes can be expressed as difference in their B.E. in the oxidized and the reduced forms i.e

$\Delta E_{\text{redox}} = {}^{\text{ox}}(BE_L - BE_{L'}) - {}^{\text{red}}(BE_L - BE_{L'})$  where subscripts L and L' represents non H-bonding and H-Bonding ligands, respectively and superscripts *ox* and *red* indicates the formal oxidation states of the metal (Fe) in these complexes. We can substitute the BE with the expression obtained from VBCI modeling above to get;

$$\Delta E_{\text{redox}} = (\text{}^{\text{ox}}\Delta_{\text{L}} \text{}^{\text{ox}}\alpha_{\text{L}}^2 - \text{}^{\text{ox}}\Delta_{\text{L}'} \text{}^{\text{ox}}\alpha_{\text{L}'}^2) - (\text{}^{\text{red}}\Delta_{\text{L}} \text{}^{\text{red}}\alpha_{\text{L}}^2 - \text{}^{\text{red}}\Delta_{\text{L}'} \text{}^{\text{red}}\alpha_{\text{L}'}^2) \quad \text{i}$$

where the superscripts and the subscripts have same implications as above.

We introduce two parameters  $k_{\text{M}}$  and  $k_{\text{L}}$  to represent the difference in the orbital energies of the oxidized and the reduced Fe ions and the difference between the orbital energies of the H-bonding and non H-bonding ligand donor orbitals, respectively, such that;

$$\text{}^{\text{ox}}\Delta_{\text{L}} = \text{}^{\text{red}}\Delta_{\text{L}} - k_{\text{M}} \text{ (where } k_{\text{M}} \text{ is positive)} \quad \text{ii}$$

$$\text{and, } \text{}^{\text{red}}\Delta_{\text{L}'} = \text{}^{\text{red}}\Delta_{\text{L}} - k_{\text{L}} \text{ (where } k_{\text{L}} \text{ is positive)} \quad \text{iii}$$

$$\text{hence, } \text{}^{\text{ox}}\Delta_{\text{L}'} = \text{}^{\text{red}}\Delta_{\text{L}} - k_{\text{M}} - k_{\text{L}} \quad \text{iv}$$

Substituting i with ii, iii and iv and rearranging we get,

$$\Delta E_{\text{redox}} = \text{}^{\text{red}}\Delta_{\text{L}} \{ (\text{}^{\text{ox}}\alpha_{\text{L}}^2 - \text{}^{\text{ox}}\alpha_{\text{L}'}^2) - (\text{}^{\text{red}}\alpha_{\text{L}}^2 - \text{}^{\text{red}}\alpha_{\text{L}'}^2) \} - k_{\text{M}} (\text{}^{\text{ox}}\alpha_{\text{L}}^2 - \text{}^{\text{ox}}\alpha_{\text{L}'}^2) - k_{\text{L}} (\text{}^{\text{ox}}\alpha_{\text{L}}^2 - \text{}^{\text{red}}\alpha_{\text{L}'}^2)$$

now, for simplicity we replace  $\text{}^{\text{red}}\Delta_{\text{L}}$  by  $\Delta$  and difference between covalencies within the same oxidation state for ligand L and L' as  $\text{}^{\text{ox/red}}(\Delta\alpha^2)_{\text{L}\rightarrow\text{L}'}$ .

$$\Delta E_{\text{redox}} = \Delta \{ \text{}^{\text{ox}}(\Delta\alpha^2)_{\text{L}\rightarrow\text{L}'} - \text{}^{\text{red}}(\Delta\alpha^2)_{\text{L}\rightarrow\text{L}'} \} - k_{\text{M}} \text{}^{\text{ox}}(\Delta\alpha^2)_{\text{L}\rightarrow\text{L}'} - k_{\text{L}} (\text{}^{\text{ox}}\alpha_{\text{L}}^2 - \text{}^{\text{red}}\alpha_{\text{L}'}^2)$$

$$\Delta E_{\text{redox}} = \text{}^{\text{ox}}(\Delta\alpha^2)_{\text{L}\rightarrow\text{L}'} [\Delta (1-v) - k_{\text{M}}] - k_{\text{L}} \text{}^{\text{ox}\rightarrow\text{red}}(\Delta\alpha^2)_{\text{L}} v$$

$$\Delta E_{\text{redox}} = \text{}^{\text{ox}}(\Delta\alpha^2)_{\text{L}\rightarrow\text{L}'} [\Delta (1-v) - k_{\text{M}}] - k_{\text{L}} \text{}^{\text{ox}\rightarrow\text{red}}(\Delta\alpha^2)_{\text{L}} v$$

where  $\text{}^{\text{ox}}(\Delta\alpha^2)_{\text{L}\rightarrow\text{L}'}$  represents the decrease in covalency due to H-bonding within a given oxidation state (superscripted as *ox* and *red*),  $v = \text{}^{\text{red}}(\Delta\alpha^2)_{\text{L}\rightarrow\text{L}'} / \text{}^{\text{ox}}(\Delta\alpha^2)_{\text{L}\rightarrow\text{L}'}$  and  $\text{}^{\text{ox}\rightarrow\text{red}}(\Delta\alpha^2)_{\text{L}}$  is the difference in the covalency of the H-bonded ligand L'-Fe bond between the oxidized and reduced states. The first term in the expression above is linear with

covalency and is dominated by  $k_M$ .<sup>1</sup> Since  $k_M$  is significantly greater than  $k_L$  the first term will dominate over the second.<sup>2</sup> Thus the above expression indicates that in a series of complexes where the change in energy of the ligand donor orbitals is significantly smaller than the energy difference between the oxidized and reduced metal 3d orbitals in the complexes (i.e.  $k_L \ll k_M$ ),  $E^o$  will vary approximately linearly with covalency ( $\Delta\alpha^2$ ) as observed experimentally.

**Optimized geometries for the complexes (the charge on Fe is +3 unless otherwise stated)**

FeOEPSPh

|    |          |           |          |
|----|----------|-----------|----------|
| Fe | 1.340066 | 13.242007 | 4.180558 |
| C  | 1.726332 | 11.372076 | 6.666425 |
| C  | 2.279793 | 11.368543 | 7.999765 |
| C  | 2.998603 | 12.523479 | 8.137331 |
| C  | 2.898567 | 13.231203 | 6.883175 |
| C  | 3.556383 | 14.426168 | 6.588697 |
| C  | 3.591580 | 15.065663 | 5.349149 |

---

<sup>1</sup> DFT calculations indicate on the FeOEPL series that  $v$  is close to 1. Though the absolute values of the oxidized covalencies are larger than those of the reduced complexes, the H-bonding interaction is stronger in the reduced form leading to a greater change in the covalency.

<sup>2</sup> In the limit where the H-bonding is weak  ${}^{\text{ox}\rightarrow\text{red}}(\Delta\alpha^2_{L'})$  may be greater than  ${}^{\text{ox}}(\Delta\alpha^2)_{L\rightarrow L'}$  however at this limit  $k_L$  will be small. In the strong H-bonding limit  $k_L$  (the ligand donor orbital stabilization by H-bonding) and  ${}^{\text{ox}}(\Delta\alpha^2)_{L\rightarrow L'}$  will be high, but the absolute covalencies of the L'-Fe bond will be small in both oxidation states hence  ${}^{\text{ox}\rightarrow\text{red}}(\Delta\alpha^2_{L'})$  will be small.

|   |           |           |           |
|---|-----------|-----------|-----------|
| C | 4.375680  | 16.241129 | 5.041489  |
| C | 4.194894  | 16.499856 | 3.710700  |
| C | 3.291050  | 15.489970 | 3.205668  |
| C | 2.845982  | 15.395081 | 1.886674  |
| C | 1.971502  | 14.436031 | 1.374785  |
| C | 1.530776  | 14.368165 | 0.000866  |
| C | 0.685436  | 13.297575 | -0.094528 |
| C | 0.616336  | 12.698348 | 1.217803  |
| C | -0.092884 | 11.537132 | 1.532203  |
| C | -0.086712 | 10.869626 | 2.757918  |
| C | -0.721084 | 9.595916  | 3.015983  |
| C | -0.412479 | 9.252461  | 4.302771  |
| C | 0.399189  | 10.322676 | 4.839539  |
| C | 0.930045  | 10.359282 | 6.128851  |
| N | 2.111079  | 12.517539 | 6.004556  |
| N | 2.931962  | 14.633962 | 4.220497  |
| N | 1.400163  | 13.411854 | 2.098549  |
| N | 0.579396  | 11.296774 | 3.884550  |
| S | -0.455244 | 14.449144 | 4.973940  |
| C | -0.727741 | 15.685480 | 3.717612  |
| C | -1.675309 | 15.459135 | 2.702951  |
| C | -1.895662 | 16.424394 | 1.717965  |
| C | -1.180204 | 17.627793 | 1.734188  |
| C | -0.250653 | 17.864066 | 2.753731  |
| C | -0.024519 | 16.903127 | 3.743039  |
| H | 4.140565  | 14.875412 | 7.391945  |
| H | 3.215034  | 16.145355 | 1.187671  |
| H | -0.666739 | 11.079757 | 0.726379  |
| H | 0.712037  | 9.509881  | 6.776588  |
| H | -2.228144 | 14.520063 | 2.692625  |

|   |           |           |           |
|---|-----------|-----------|-----------|
| H | -2.628320 | 16.231159 | 0.932472  |
| H | -1.349377 | 18.376511 | 0.958652  |
| H | 0.308491  | 18.801295 | 2.780383  |
| H | 0.700737  | 17.085112 | 4.536520  |
| H | 2.143054  | 10.574205 | 8.727945  |
| H | 3.566973  | 12.860325 | 8.999557  |
| H | 4.995370  | 16.781091 | 5.751800  |
| H | 4.635360  | 17.296099 | 3.117653  |
| H | 1.831599  | 15.056694 | -0.783105 |
| H | 0.160519  | 12.934559 | -0.973224 |
| H | -1.307388 | 9.033992  | 2.294748  |
| H | -0.697645 | 8.354640  | 4.843700  |

#### FeOEPL1

|    |           |           |          |
|----|-----------|-----------|----------|
| Fe | 2.077129  | 5.096144  | 3.600082 |
| S  | 3.690708  | 3.913810  | 2.399082 |
| F  | 1.199087  | 0.806842  | 0.949921 |
| F  | 0.573004  | -1.107171 | 1.832475 |
| F  | 2.227781  | -1.052998 | 0.394798 |
| O  | 3.006659  | -1.268789 | 3.209337 |
| N  | 3.109926  | 1.021133  | 2.802286 |
| N  | 2.732296  | 7.085888  | 3.400622 |
| N  | 0.789124  | 5.486867  | 1.997083 |
| N  | 0.714057  | 3.621626  | 4.203954 |
| N  | 2.667158  | 5.215295  | 5.603136 |
| C  | 3.613144  | 7.735820  | 4.238112 |
| C  | 2.612940  | 7.870239  | 2.274807 |
| C  | 0.941562  | 6.484162  | 1.056834 |
| C  | -0.162307 | 4.620388  | 1.498620 |
| C  | -0.227692 | 3.013915  | 3.401628 |

|   |           |           |           |
|---|-----------|-----------|-----------|
| C | 0.807561  | 2.855423  | 5.345962  |
| C | 2.484913  | 4.238390  | 6.559193  |
| C | 3.556152  | 6.124069  | 6.137167  |
| C | 4.065171  | 8.961098  | 3.619345  |
| C | 3.445170  | 9.045139  | 2.403714  |
| C | 0.069750  | 6.233788  | -0.066893 |
| C | -0.613394 | 5.081235  | 0.207567  |
| C | -0.734167 | 1.826864  | 4.051928  |
| C | -0.091123 | 1.727027  | 5.254303  |
| C | 3.289114  | 4.534574  | 7.720870  |
| C | 3.951339  | 5.702780  | 7.460222  |
| C | 1.795001  | 7.580909  | 1.181884  |
| C | -0.629780 | 3.478035  | 2.148894  |
| C | 1.635107  | 3.138553  | 6.432575  |
| C | 3.999470  | 7.284188  | 5.500076  |
| C | 4.438767  | 2.861501  | 3.621629  |
| C | 4.084457  | 1.487062  | 3.707027  |
| C | 4.699686  | 0.660002  | 4.660289  |
| C | 5.663937  | 1.190655  | 5.519302  |
| C | 6.030661  | 2.537926  | 5.433205  |
| C | 5.420592  | 3.362926  | 4.488921  |
| C | 2.676927  | -0.250830 | 2.607456  |
| C | 1.655230  | -0.391135 | 1.434940  |
| H | 2.722864  | 1.763793  | 2.205777  |
| H | 4.414590  | -0.387118 | 4.705650  |
| H | 6.136034  | 0.540345  | 6.256764  |
| H | 6.790989  | 2.948877  | 6.097548  |
| H | 5.697855  | 4.413541  | 4.405441  |
| H | 1.808997  | 8.289344  | 0.354153  |
| H | -1.385217 | 2.890700  | 1.627996  |



|   |           |          |           |
|---|-----------|----------|-----------|
| H | 1.604789  | 2.440323 | 7.268619  |
| H | 4.704432  | 7.906839 | 6.050551  |
| H | -0.009002 | 6.865249 | -0.947108 |
| H | -1.363645 | 4.585604 | -0.401782 |
| H | 4.761762  | 9.664450 | 4.066384  |
| H | 3.535558  | 9.829026 | 1.657368  |
| H | -1.478835 | 1.156641 | 3.633165  |
| H | -0.206490 | 0.958795 | 6.013346  |
| H | 3.335560  | 3.923020 | 8.617218  |
| H | 4.644719  | 6.237629 | 8.102911  |

#### FeOEPL2

|    |           |           |           |
|----|-----------|-----------|-----------|
| Fe | 0.823789  | 4.008126  | 1.427057  |
| S  | 2.457452  | 5.582642  | 0.719978  |
| F  | 5.599144  | 2.748125  | 0.607877  |
| F  | 6.563345  | 1.714380  | 2.294073  |
| F  | 7.647368  | 3.275807  | 1.200022  |
| F  | -0.270894 | 8.751632  | 0.057608  |
| F  | -1.369659 | 9.962725  | 1.530701  |
| F  | 0.314420  | 10.836370 | 0.430307  |
| O  | 6.579113  | 4.152764  | 3.728835  |
| O  | 0.968427  | 10.063386 | 3.126781  |
| N  | 4.815322  | 4.657142  | 2.292066  |
| N  | -0.524855 | 4.203085  | -0.166755 |
| N  | 1.472537  | 8.106922  | 1.965073  |
| N  | 1.480015  | 2.246453  | 0.485240  |
| N  | 1.481496  | 3.159550  | 3.218556  |
| N  | -0.541137 | 5.105445  | 2.571811  |
| C  | -1.538742 | 5.135720  | -0.269024 |
| C  | -2.055092 | 5.152691  | -1.615720 |

|   |           |          |           |
|---|-----------|----------|-----------|
| C | 0.466363  | 2.581678 | -1.730964 |
| C | -1.351580 | 4.218375 | -2.324941 |
| C | -0.405540 | 3.622411 | -1.412843 |
| C | 2.783338  | 1.267323 | 2.331320  |
| C | 1.323152  | 1.927165 | -0.847537 |
| C | 2.143706  | 0.786584 | -1.180155 |
| C | 0.450113  | 4.744889 | 4.795445  |
| C | 2.786530  | 0.410386 | -0.033856 |
| C | 2.366646  | 1.323002 | 1.002304  |
| C | -2.012214 | 5.925500 | 0.777660  |
| C | 2.369561  | 2.111805 | 3.360267  |
| C | 2.788272  | 2.006205 | 4.736941  |
| C | 1.318647  | 3.701932 | 4.477584  |
| C | 2.140730  | 2.992546 | 5.427474  |
| C | -0.429043 | 5.380376 | 3.919260  |
| C | -1.388277 | 6.390849 | 4.295748  |
| C | -1.559726 | 5.907285 | 2.095797  |
| C | -2.090977 | 6.713961 | 3.168175  |
| C | 3.069975  | 6.318203 | 2.218071  |
| C | 4.187400  | 5.763570 | 2.897715  |
| C | 4.651569  | 6.330446 | 4.093430  |
| C | 4.023582  | 7.468912 | 4.597296  |
| C | 2.964787  | 8.077597 | 3.924949  |
| C | 2.496188  | 7.513160 | 2.729374  |
| C | 5.929564  | 3.993239 | 2.700622  |
| C | 6.429551  | 2.921288 | 1.682059  |
| C | 0.843107  | 9.293487 | 2.180083  |
| C | -0.131511 | 9.705165 | 1.032049  |
| H | 4.383791  | 4.372719 | 1.405340  |
| H | 1.235731  | 7.582248 | 1.115144  |

|   |           |           |           |
|---|-----------|-----------|-----------|
| H | 0.447125  | 2.219311  | -2.758283 |
| H | 3.488544  | 0.479933  | 2.594115  |
| H | 0.430060  | 5.069335  | 5.835114  |
| H | -2.822106 | 6.615789  | 0.545864  |
| H | 5.500160  | 5.877257  | 4.596030  |
| H | 4.385352  | 7.908222  | 5.527133  |
| H | 2.501271  | 8.986442  | 4.295211  |
| H | -2.859361 | 5.793319  | -1.965355 |
| H | -1.467213 | 3.943444  | -3.369347 |
| H | 2.205509  | 0.330008  | -2.163624 |
| H | 3.481541  | -0.412073 | 0.106997  |
| H | 3.489056  | 1.269910  | 5.119052  |
| H | 2.206503  | 3.222009  | 6.486738  |
| H | -1.507187 | 6.793808  | 5.297032  |
| H | -2.898600 | 7.432215  | 3.065346  |

FeOEPSPh+ 2H<sub>2</sub>O

|    |           |          |           |
|----|-----------|----------|-----------|
| Fe | 0.823800  | 4.008100 | 1.427100  |
| S  | 2.457500  | 5.582600 | 0.720000  |
| N  | -0.524900 | 4.203100 | -0.166800 |
| N  | 1.480000  | 2.246500 | 0.485200  |
| N  | 1.481500  | 3.159500 | 3.218600  |
| N  | -0.541100 | 5.105400 | 2.571800  |
| C  | -1.538700 | 5.135700 | -0.269000 |
| C  | -2.055100 | 5.152700 | -1.615700 |
| C  | 0.466400  | 2.581700 | -1.731000 |
| C  | -1.351600 | 4.218400 | -2.324900 |
| C  | -0.405500 | 3.622400 | -1.412800 |
| C  | 2.783300  | 1.267300 | 2.331300  |
| C  | 1.323200  | 1.927200 | -0.847500 |
| C  | 2.143700  | 0.786600 | -1.180200 |

|   |           |           |           |
|---|-----------|-----------|-----------|
| C | 0.450100  | 4.744900  | 4.795400  |
| C | 2.786500  | 0.410400  | -0.033900 |
| C | 2.366600  | 1.323000  | 1.002300  |
| C | -2.012200 | 5.925500  | 0.777700  |
| C | 2.369600  | 2.111800  | 3.360300  |
| C | 2.788300  | 2.006200  | 4.736900  |
| C | 1.318600  | 3.701900  | 4.477600  |
| C | 2.140700  | 2.992500  | 5.427500  |
| C | -0.429000 | 5.380400  | 3.919300  |
| C | -1.388300 | 6.390800  | 4.295700  |
| C | -1.559700 | 5.907300  | 2.095800  |
| C | -2.091000 | 6.714000  | 3.168200  |
| C | 3.070000  | 6.318200  | 2.218100  |
| C | 4.187400  | 5.763600  | 2.897700  |
| C | 4.651600  | 6.330400  | 4.093400  |
| C | 4.023600  | 7.468900  | 4.597300  |
| C | 2.964800  | 8.077600  | 3.924900  |
| C | 2.496200  | 7.513200  | 2.729400  |
| H | 0.447100  | 2.219300  | -2.758300 |
| H | 3.488500  | 0.479900  | 2.594100  |
| H | 0.430100  | 5.069300  | 5.835100  |
| H | -2.822100 | 6.615800  | 0.545900  |
| H | 5.500200  | 5.877300  | 4.596000  |
| H | 4.385400  | 7.908200  | 5.527100  |
| H | 2.544000  | 8.907600  | 4.291000  |
| H | -2.859400 | 5.793300  | -1.965400 |
| H | -1.467200 | 3.943400  | -3.369300 |
| H | 2.205500  | 0.330000  | -2.163600 |
| H | 3.481500  | -0.412100 | 0.107000  |
| H | 3.489100  | 1.269900  | 5.119100  |

|   |           |          |           |
|---|-----------|----------|-----------|
| H | 2.206500  | 3.222000 | 6.486700  |
| H | -1.507200 | 6.793800 | 5.297000  |
| H | -2.898600 | 7.432200 | 3.065300  |
| H | 1.750600  | 7.956400 | 2.231800  |
| H | 4.647800  | 4.960500 | 2.519500  |
| O | 0.675297  | 8.359366 | -0.206829 |
| H | 1.059187  | 7.469353 | -0.030010 |
| H | 1.363198  | 8.788472 | -0.745658 |
| O | 5.303608  | 3.722648 | 0.268750  |
| H | 5.791565  | 4.400164 | -0.231622 |
| H | 4.390795  | 4.090442 | 0.300339  |

FeOEPSMe

|    |           |          |           |
|----|-----------|----------|-----------|
| Fe | 2.081624  | 5.093943 | 3.589399  |
| S  | 3.685299  | 3.940737 | 2.415933  |
| N  | 2.731249  | 7.090521 | 3.396029  |
| N  | 0.780088  | 5.495791 | 1.996869  |
| N  | 0.720549  | 3.605654 | 4.201711  |
| N  | 2.680591  | 5.199985 | 5.596241  |
| C  | 3.610524  | 7.736264 | 4.233691  |
| C  | 2.613360  | 7.872721 | 2.271745  |
| C  | 0.933661  | 6.490681 | 1.057479  |
| C  | -0.165855 | 4.625480 | 1.499977  |
| C  | -0.226314 | 3.006716 | 3.401471  |
| C  | 0.805494  | 2.847699 | 5.346712  |
| C  | 2.489797  | 4.230633 | 6.558173  |
| C  | 3.560476  | 6.117485 | 6.131473  |
| C  | 4.065324  | 8.963024 | 3.615812  |
| C  | 3.450949  | 9.045410 | 2.397986  |
| C  | 0.063384  | 6.238665 | -0.068282 |
| C  | -0.618697 | 5.085260 | 0.206612  |

|   |           |          |           |
|---|-----------|----------|-----------|
| C | -0.748378 | 1.827003 | 4.059462  |
| C | -0.108513 | 1.728524 | 5.263333  |
| C | 3.283250  | 4.537813 | 7.725330  |
| C | 3.944949  | 5.706593 | 7.461323  |
| C | 1.791897  | 7.585533 | 1.180961  |
| C | -0.626381 | 3.476921 | 2.148687  |
| C | 1.635385  | 3.132426 | 6.433377  |
| C | 3.996277  | 7.282488 | 5.495911  |
| C | 4.474111  | 2.828816 | 3.637799  |
| H | 1.807250  | 8.294318 | 0.353258  |
| H | -1.382169 | 2.892471 | 1.624592  |
| H | 1.592906  | 2.445550 | 7.278383  |
| H | 4.694547  | 7.909174 | 6.050374  |
| H | -0.012133 | 6.867116 | -0.951071 |
| H | -1.363823 | 4.587069 | -0.406393 |
| H | 4.755933  | 9.669158 | 4.067617  |
| H | 3.538811  | 9.832279 | 1.654584  |
| H | -1.506918 | 1.166476 | 3.650266  |
| H | -0.241266 | 0.972361 | 6.031623  |
| H | 3.316525  | 3.940167 | 8.631805  |
| H | 4.625840  | 6.250511 | 8.109370  |
| H | 5.244378  | 2.242641 | 3.119042  |
| H | 3.727992  | 2.146809 | 4.068737  |
| H | 4.940106  | 3.415145 | 4.441350  |

FeOEPSMe+2H<sub>2</sub>O

|    |          |          |          |
|----|----------|----------|----------|
| Fe | 2.080667 | 5.097663 | 3.587851 |
| S  | 3.746821 | 3.937062 | 2.461648 |
| N  | 2.704168 | 7.099465 | 3.407822 |
| N  | 0.780116 | 5.493000 | 1.993472 |
| N  | 0.716880 | 3.620336 | 4.199475 |

|   |           |          |           |
|---|-----------|----------|-----------|
| N | 2.680391  | 5.199320 | 5.590751  |
| C | 3.578163  | 7.753266 | 4.249197  |
| C | 2.577867  | 7.891200 | 2.287171  |
| C | 0.921248  | 6.496939 | 1.059536  |
| C | -0.173931 | 4.627763 | 1.497641  |
| C | -0.242064 | 3.027481 | 3.405238  |
| C | 0.791441  | 2.864386 | 5.349538  |
| C | 2.489079  | 4.229886 | 6.553744  |
| C | 3.555373  | 6.121221 | 6.130864  |
| C | 4.016287  | 8.988158 | 3.640722  |
| C | 3.399396  | 9.072929 | 2.425234  |
| C | 0.044147  | 6.250093 | -0.060375 |
| C | -0.635041 | 5.093947 | 0.212024  |
| C | -0.779783 | 1.864121 | 4.070366  |
| C | -0.140964 | 1.762518 | 5.273953  |
| C | 3.281366  | 4.536866 | 7.720103  |
| C | 3.940688  | 5.707816 | 7.458347  |
| C | 1.764983  | 7.601130 | 1.191782  |
| C | -0.641599 | 3.487534 | 2.151178  |
| C | 1.626683  | 3.138812 | 6.432790  |
| C | 3.976339  | 7.294576 | 5.503856  |
| C | 4.494983  | 2.787308 | 3.684896  |
| H | 1.772878  | 8.315600 | 0.369202  |
| H | -1.397815 | 2.899822 | 1.632180  |
| H | 1.577942  | 2.453909 | 7.278794  |
| H | 4.676859  | 7.921084 | 6.055194  |
| H | -0.041788 | 6.886318 | -0.936453 |
| H | -1.385266 | 4.598185 | -0.397004 |
| H | 4.715597  | 9.688030 | 4.087829  |
| H | 3.489036  | 9.859431 | 1.681676  |

|   |           |          |          |
|---|-----------|----------|----------|
| H | -1.544405 | 1.211674 | 3.659455 |
| H | -0.284289 | 1.013049 | 6.047043 |
| H | 3.312878  | 3.939486 | 8.626784 |
| H | 4.616589  | 6.254953 | 8.109170 |
| H | 5.276638  | 2.216433 | 3.169536 |
| H | 3.734092  | 2.097479 | 4.067808 |
| H | 4.936669  | 3.350017 | 4.515375 |
| H | 2.216791  | 2.074464 | 1.646113 |
| O | 1.841452  | 1.187336 | 1.446653 |
| H | 2.587173  | 0.718108 | 1.034690 |
| O | 6.379444  | 6.291519 | 2.803272 |
| H | 6.959065  | 5.661879 | 3.265923 |
| H | 5.558156  | 5.771970 | 2.650523 |

Fe<sup>II</sup>OEPSMe

|    |           |          |          |
|----|-----------|----------|----------|
| Fe | 2.079128  | 5.091917 | 3.589216 |
| S  | 3.697693  | 3.892368 | 2.434777 |
| N  | 2.738948  | 7.105469 | 3.389675 |
| N  | 0.829196  | 5.462403 | 1.942769 |
| N  | 0.726003  | 3.584719 | 4.188967 |
| N  | 2.757188  | 5.161889 | 5.573489 |
| C  | 3.611372  | 7.753428 | 4.234609 |
| C  | 2.599557  | 7.896113 | 2.274856 |
| C  | 0.934087  | 6.493217 | 1.037268 |
| C  | -0.149423 | 4.611300 | 1.469955 |
| C  | -0.238901 | 3.005099 | 3.397336 |
| C  | 0.801534  | 2.842944 | 5.342877 |
| C  | 2.520612  | 4.216843 | 6.548791 |
| C  | 3.589541  | 6.111963 | 6.130830 |
| C  | 4.040906  | 8.992753 | 3.633522 |
| C  | 3.413915  | 9.082065 | 2.412400 |



|   |           |          |           |
|---|-----------|----------|-----------|
| C | 0.016744  | 6.268150 | -0.068634 |
| C | -0.650906 | 5.105897 | 0.200269  |
| C | -0.791229 | 1.856302 | 4.070345  |
| C | -0.143037 | 1.751649 | 5.281104  |
| C | 3.271213  | 4.554831 | 7.746881  |
| C | 3.927363  | 5.727142 | 7.487858  |
| C | 1.767276  | 7.603903 | 1.179342  |
| C | -0.625033 | 3.479347 | 2.131430  |
| C | 1.646905  | 3.134126 | 6.430550  |
| C | 4.003498  | 7.285242 | 5.500312  |
| C | 4.527295  | 2.793596 | 3.652576  |
| H | 1.753189  | 8.334487 | 0.368928  |
| H | -1.407295 | 2.913658 | 1.621475  |
| H | 1.577596  | 2.467690 | 7.291956  |
| H | 4.680583  | 7.928258 | 6.065943  |
| H | -0.104927 | 6.927830 | -0.925090 |
| H | -1.424297 | 4.625566 | -0.395619 |
| H | 4.730004  | 9.703613 | 4.084717  |
| H | 3.487631  | 9.881898 | 1.678984  |
| H | -1.571570 | 1.210463 | 3.673004  |
| H | -0.298134 | 1.009466 | 6.061020  |
| H | 3.267618  | 3.979565 | 8.670107  |
| H | 4.568649  | 6.296255 | 8.157907  |
| H | 5.312042  | 2.217929 | 3.141319  |
| H | 3.801972  | 2.093796 | 4.090419  |
| H | 4.981321  | 3.382114 | 4.461068  |

Fe<sup>II</sup>OEPSMe+ 2H<sub>2</sub>O

|    |          |          |          |
|----|----------|----------|----------|
| Fe | 2.036775 | 5.132720 | 3.628289 |
| S  | 3.676975 | 3.867119 | 2.494574 |
| N  | 2.683213 | 7.150523 | 3.430932 |

|   |           |          |           |
|---|-----------|----------|-----------|
| N | 0.795166  | 5.492761 | 1.972568  |
| N | 0.688357  | 3.637841 | 4.230284  |
| N | 2.726454  | 5.216014 | 5.610927  |
| C | 3.542115  | 7.812766 | 4.278950  |
| C | 2.516634  | 7.952380 | 2.326453  |
| C | 0.879988  | 6.531533 | 1.074777  |
| C | -0.176828 | 4.635870 | 1.499906  |
| C | -0.266844 | 3.045626 | 3.437293  |
| C | 0.764401  | 2.901751 | 5.388316  |
| C | 2.488470  | 4.273246 | 6.588154  |
| C | 3.552842  | 6.167807 | 6.169315  |
| C | 3.931250  | 9.072359 | 3.691916  |
| C | 3.295058  | 9.159593 | 2.477202  |
| C | -0.038940 | 6.303005 | -0.028549 |
| C | -0.688941 | 5.130676 | 0.234513  |
| C | -0.816636 | 1.898874 | 4.116222  |
| C | -0.175801 | 1.807154 | 5.329452  |
| C | 3.236307  | 4.613543 | 7.786702  |
| C | 3.890260  | 5.786077 | 7.527944  |
| C | 1.691016  | 7.655711 | 1.228966  |
| C | -0.646686 | 3.503759 | 2.164873  |
| C | 1.610340  | 3.194521 | 6.472868  |
| C | 3.952450  | 7.346617 | 5.539473  |
| C | 4.524278  | 2.816201 | 3.748095  |
| H | 1.660023  | 8.396752 | 0.429041  |
| H | -1.416669 | 2.924978 | 1.652694  |
| H | 1.540458  | 2.529804 | 7.335225  |
| H | 4.618766  | 8.000849 | 6.104458  |
| H | -0.173765 | 6.967819 | -0.878431 |
| H | -1.457286 | 4.642952 | -0.360790 |

|   |           |          |          |
|---|-----------|----------|----------|
| H | 4.597220  | 9.799215 | 4.151045 |
| H | 3.338845  | 9.971463 | 1.755476 |
| H | -1.584985 | 1.242363 | 3.715459 |
| H | -0.327071 | 1.066955 | 6.111344 |
| H | 3.231632  | 4.039468 | 8.710257 |
| H | 4.527592  | 6.358137 | 8.198646 |
| H | 5.430257  | 2.391184 | 3.297533 |
| H | 3.861470  | 2.002276 | 4.066269 |
| H | 4.807169  | 3.418025 | 4.620033 |
| H | 2.641155  | 1.998914 | 1.450300 |
| O | 2.532411  | 1.133495 | 0.972664 |
| H | 3.366814  | 1.090298 | 0.473365 |
| O | 6.562648  | 5.465198 | 2.431237 |
| H | 6.337144  | 6.080359 | 3.153402 |
| H | 5.681049  | 5.031618 | 2.273075 |
